# Supplementary material for: Serum Glycated Albumin to Guide the Diagnosis of Diabetes Mellitus
Source: PubMed Central journal article supplement (PMC4713060; doi:10.1371/journal.pone.0146780), 2016-01-14

**Supplementary Figure 1A.**

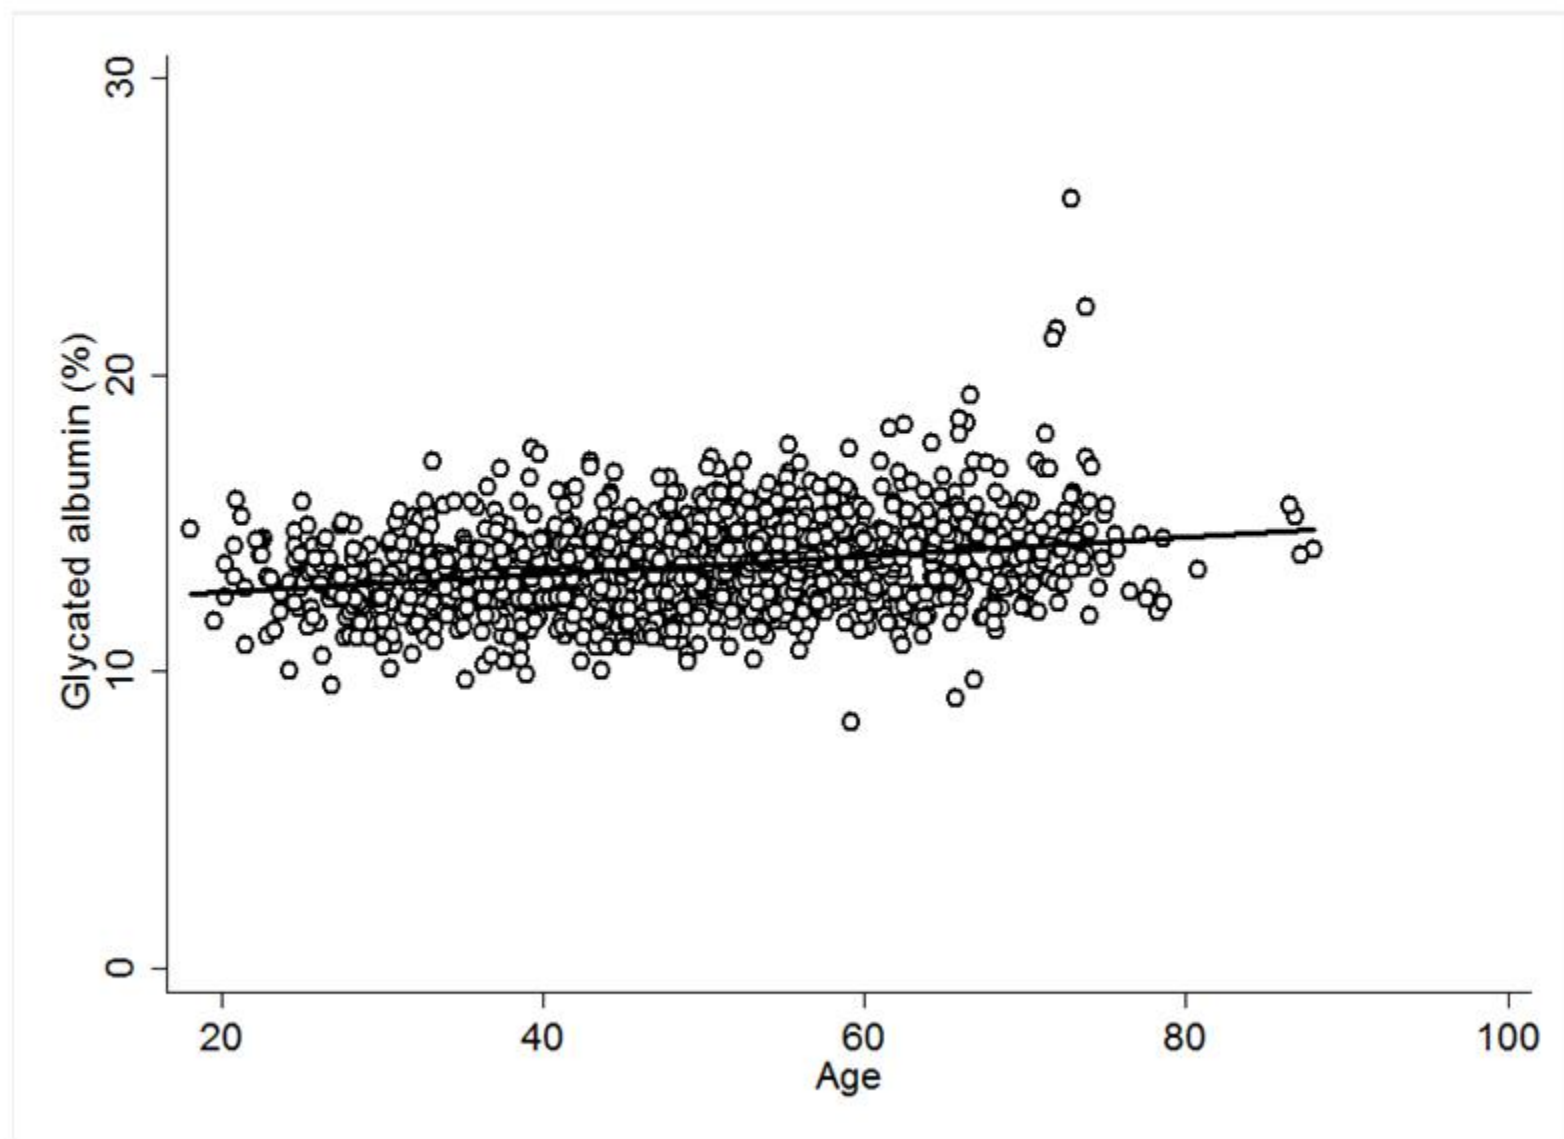

## Supplementary Figure 1B.

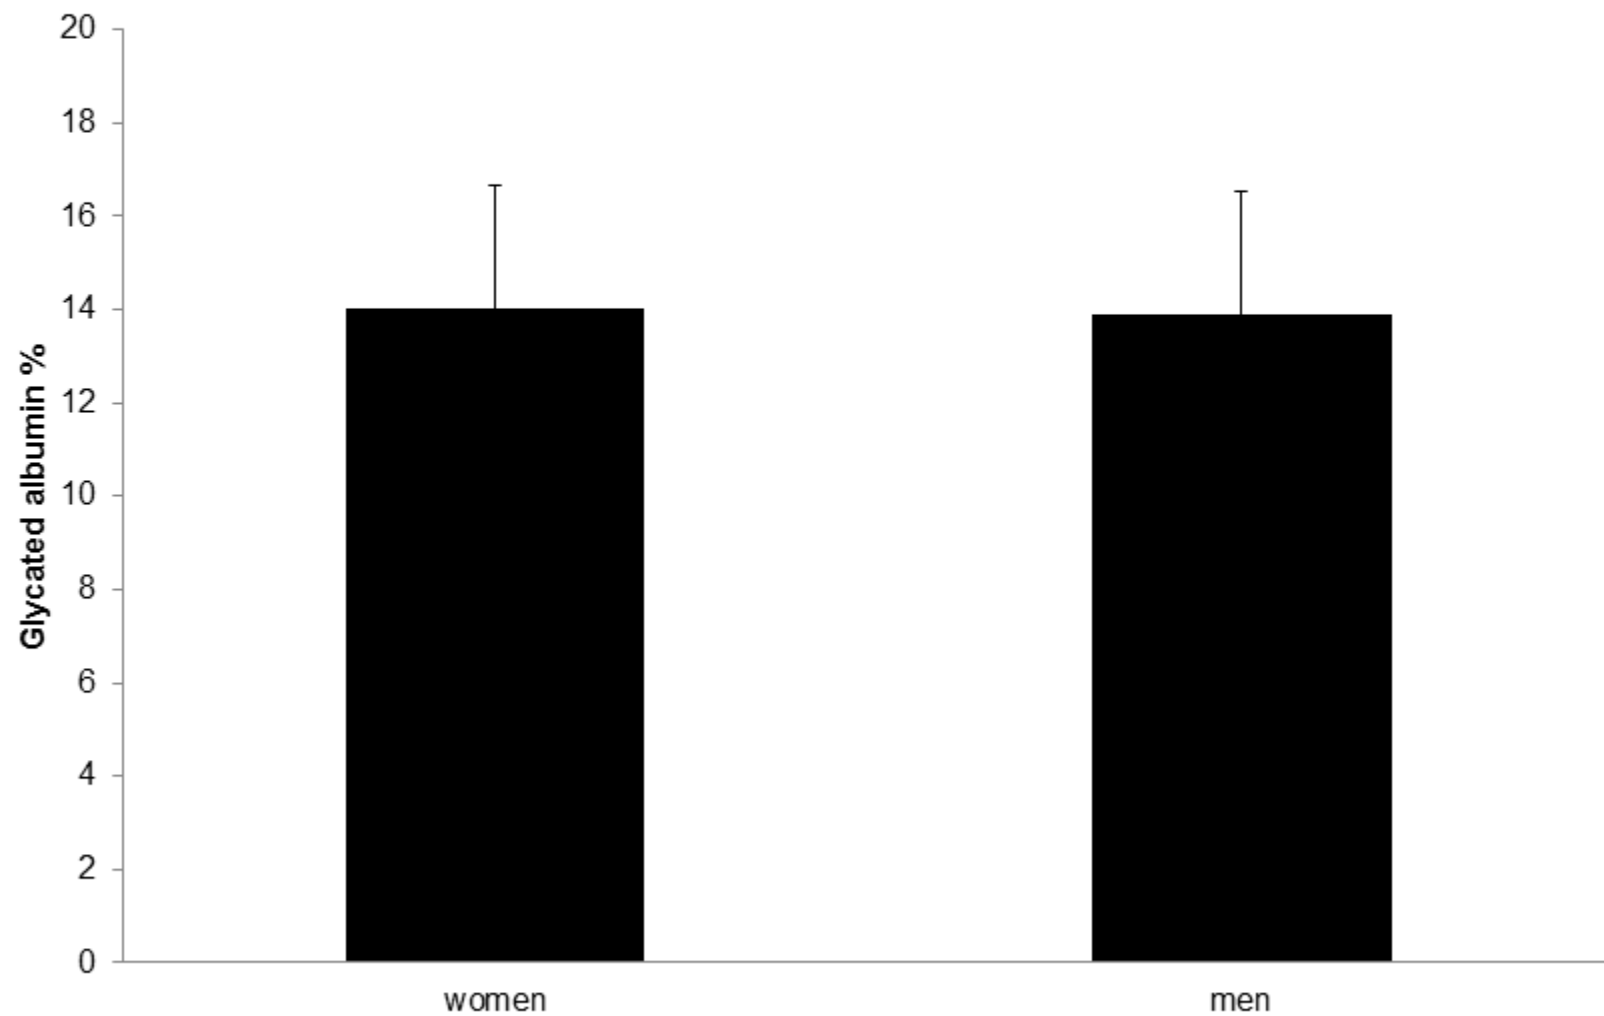

**Supplementary Figure 1C.**

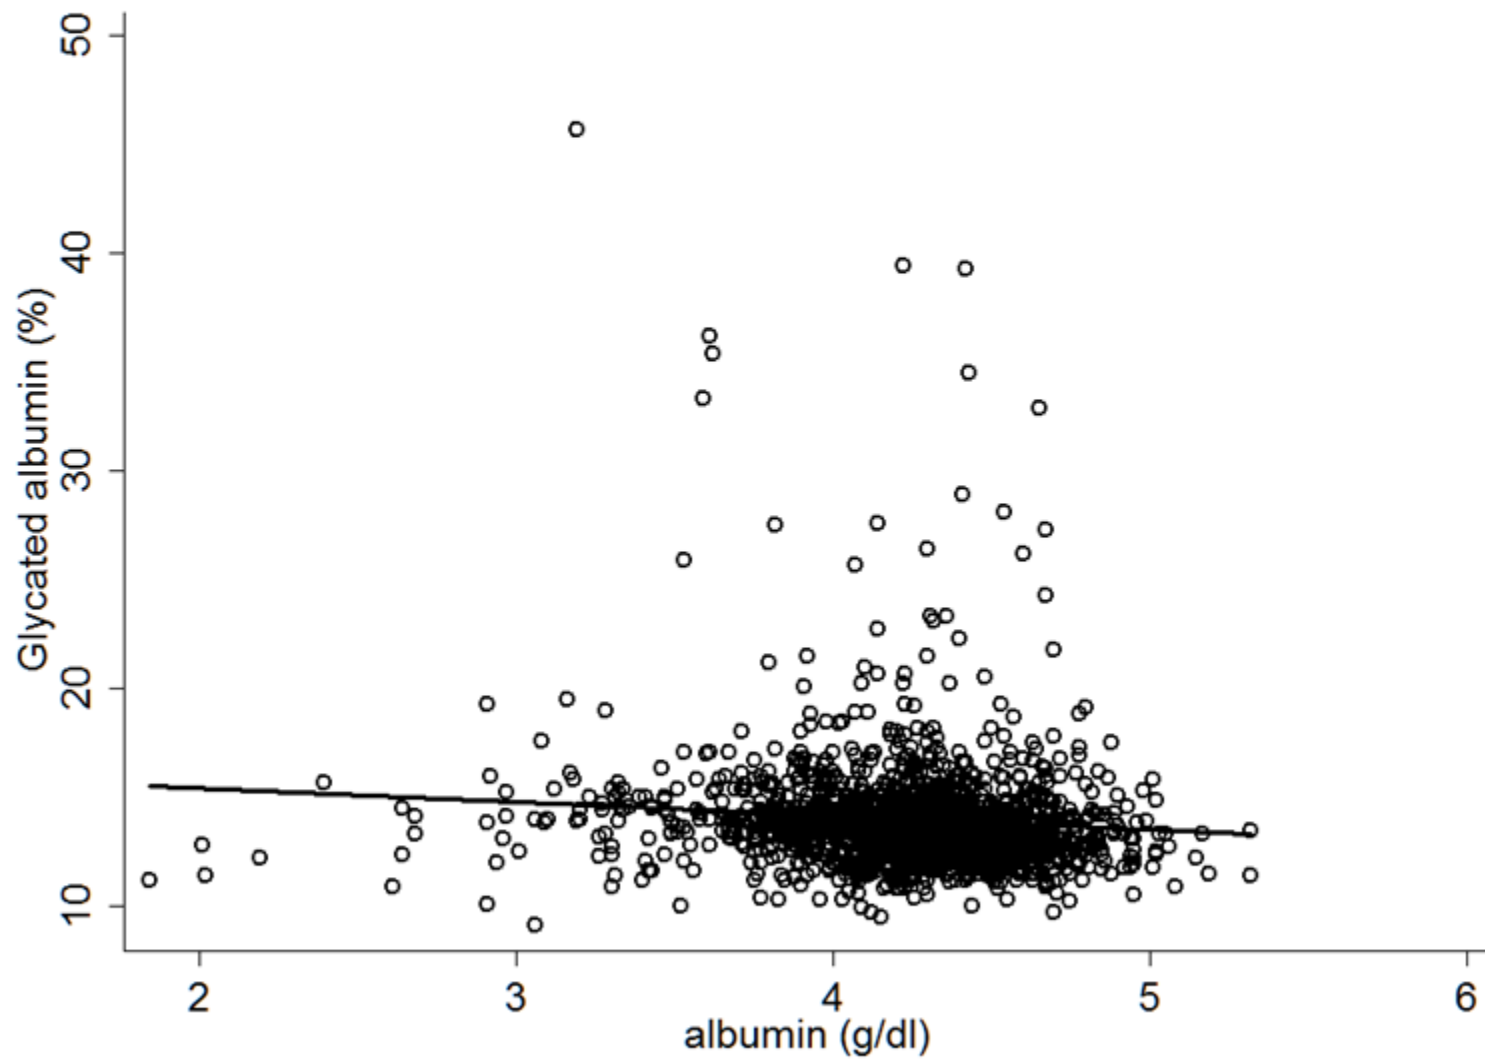

**Supplementary Figure 1D.**

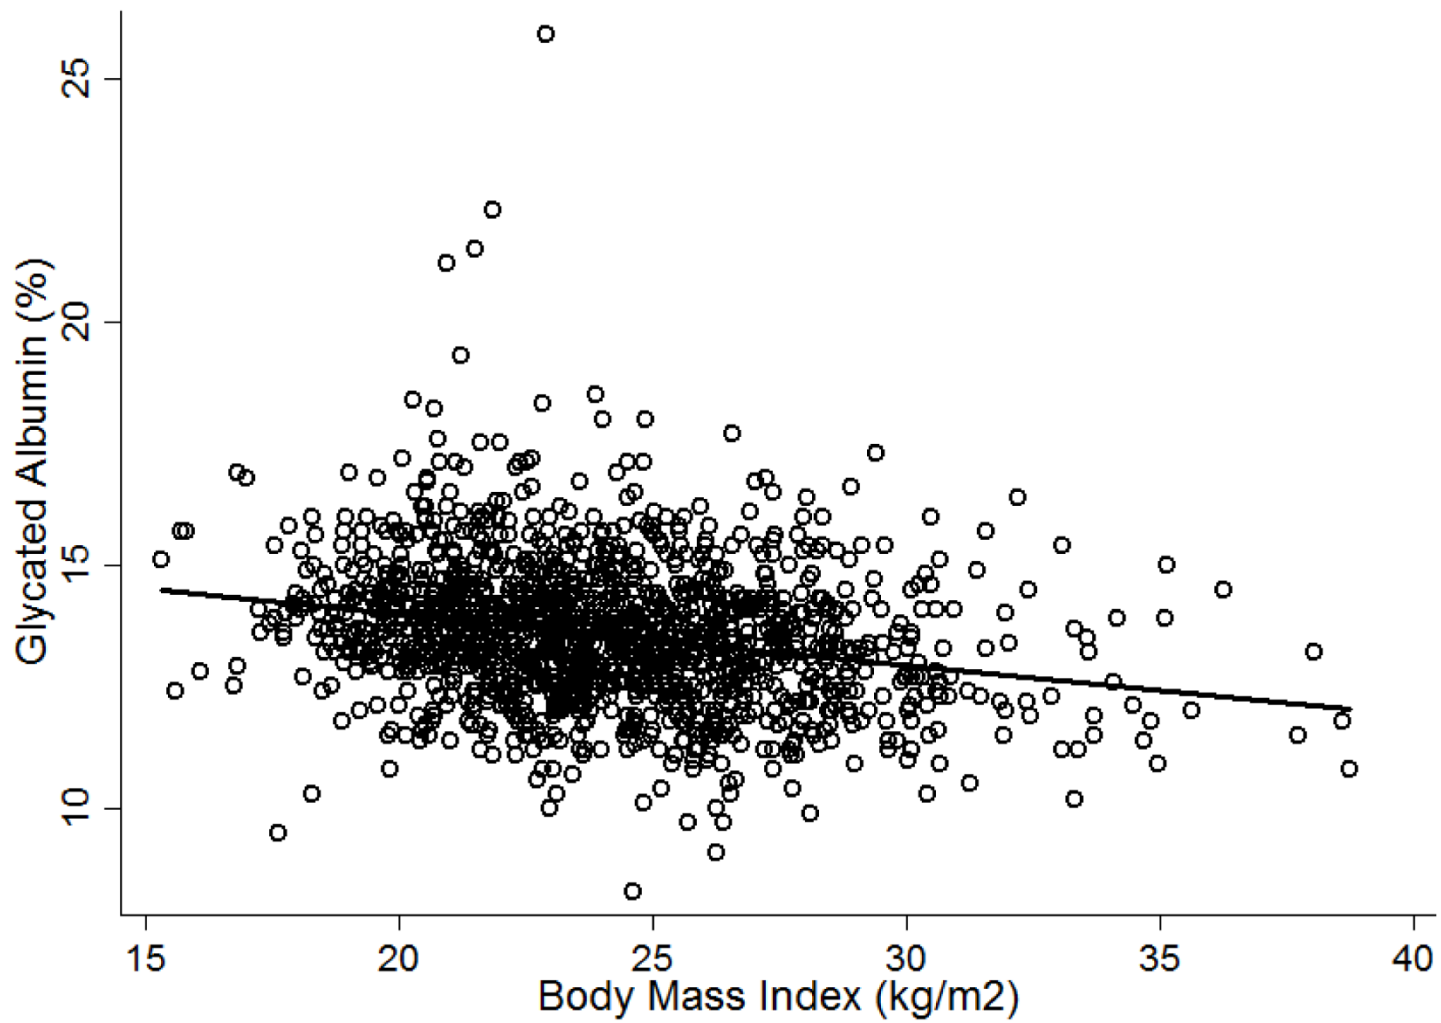

**Supplementary Figure 1E.**

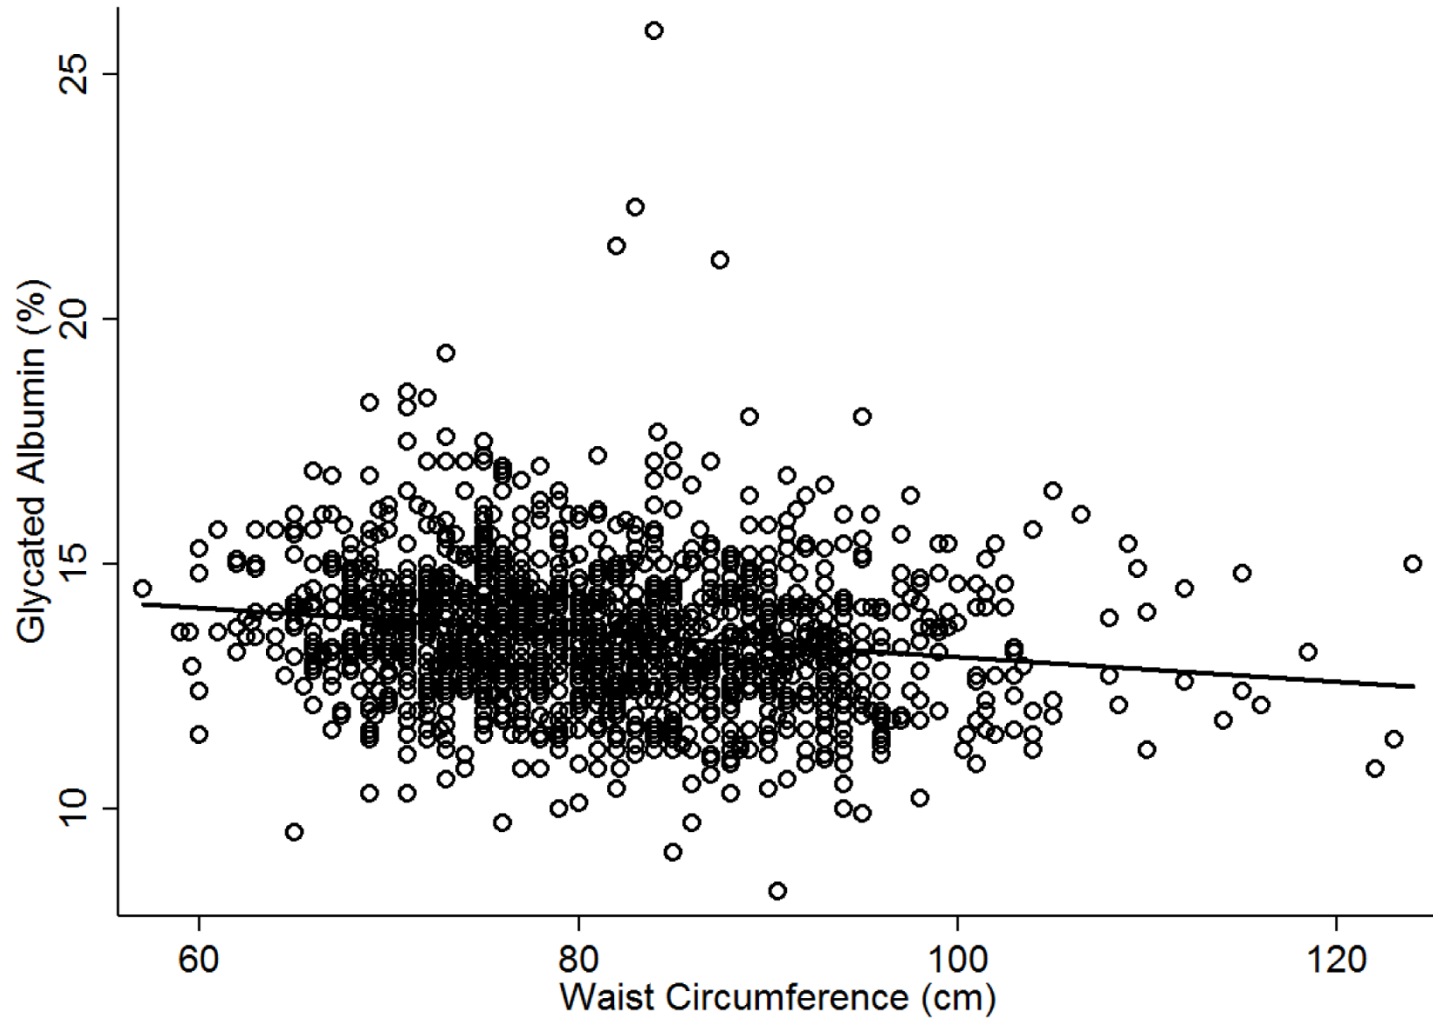

Supplement: pone.0146780.s001.pdf [file pone.0146780.s001.pdf]
