# Supplementary material for: Serum Glycated Albumin to Guide the Diagnosis of Diabetes Mellitus
Source: PubMed Central journal article supplement (PMC4713060; doi:10.1371/journal.pone.0146780), 2016-01-14

**Supplementary Figure 2A.**

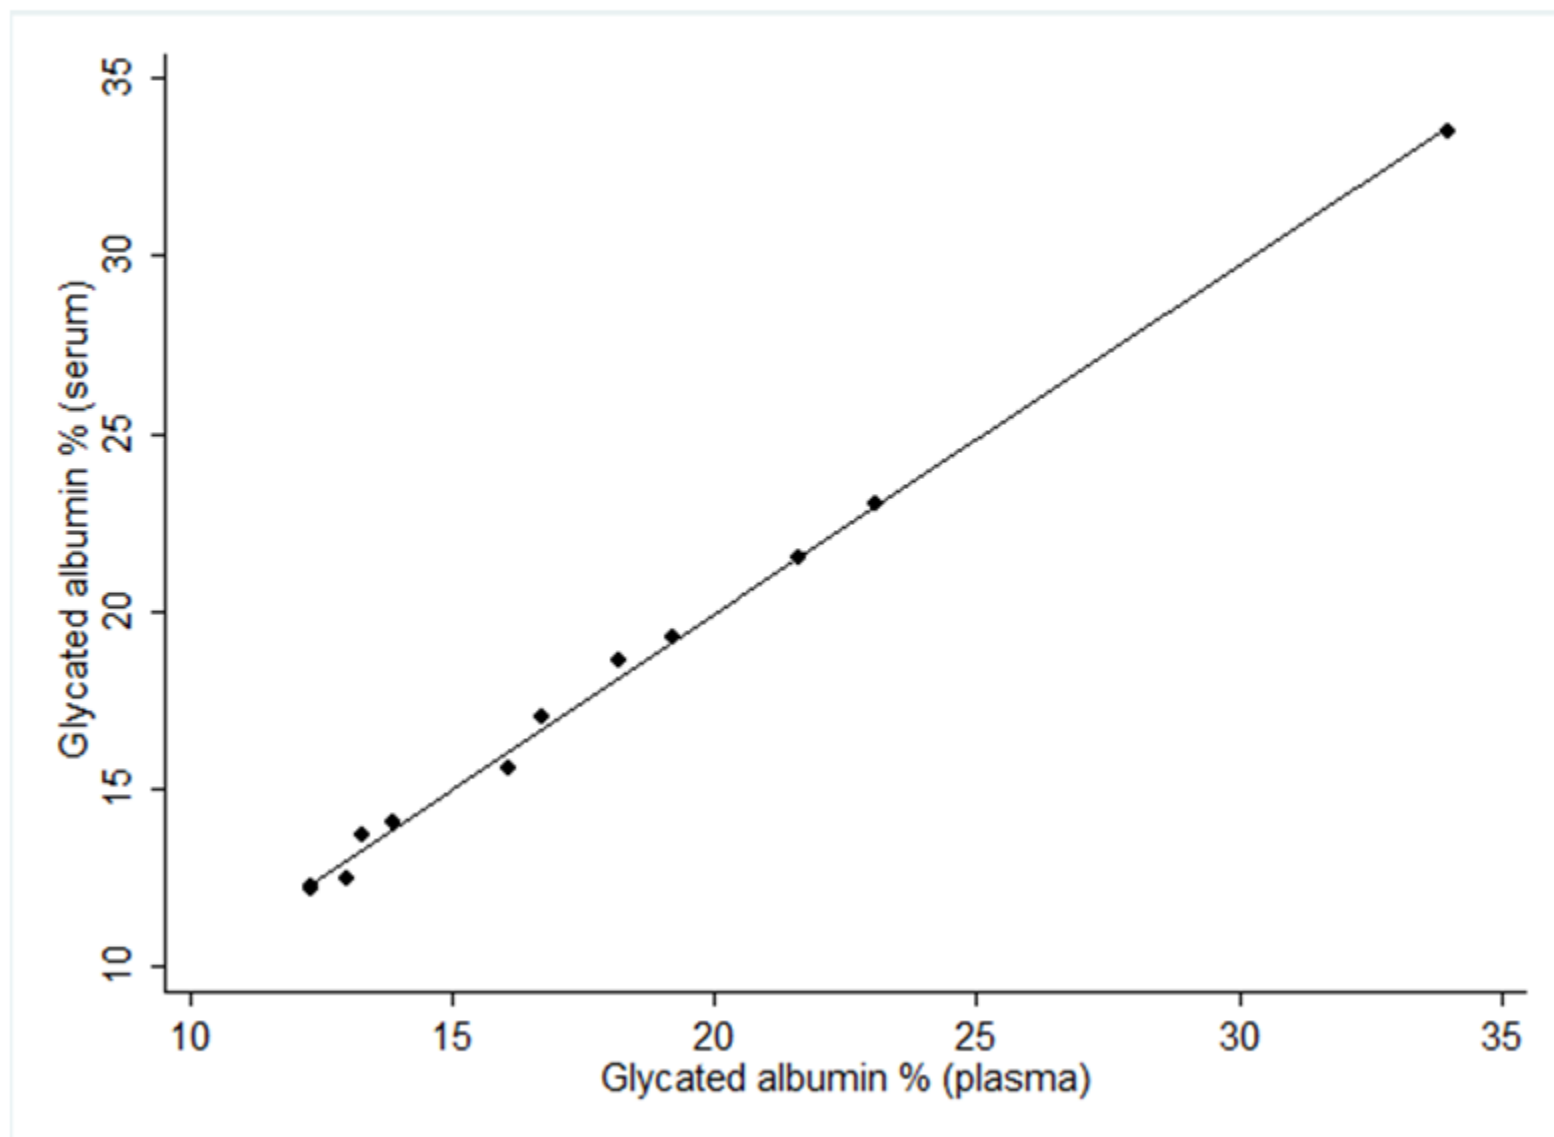

## Supplementary Figure 2B.

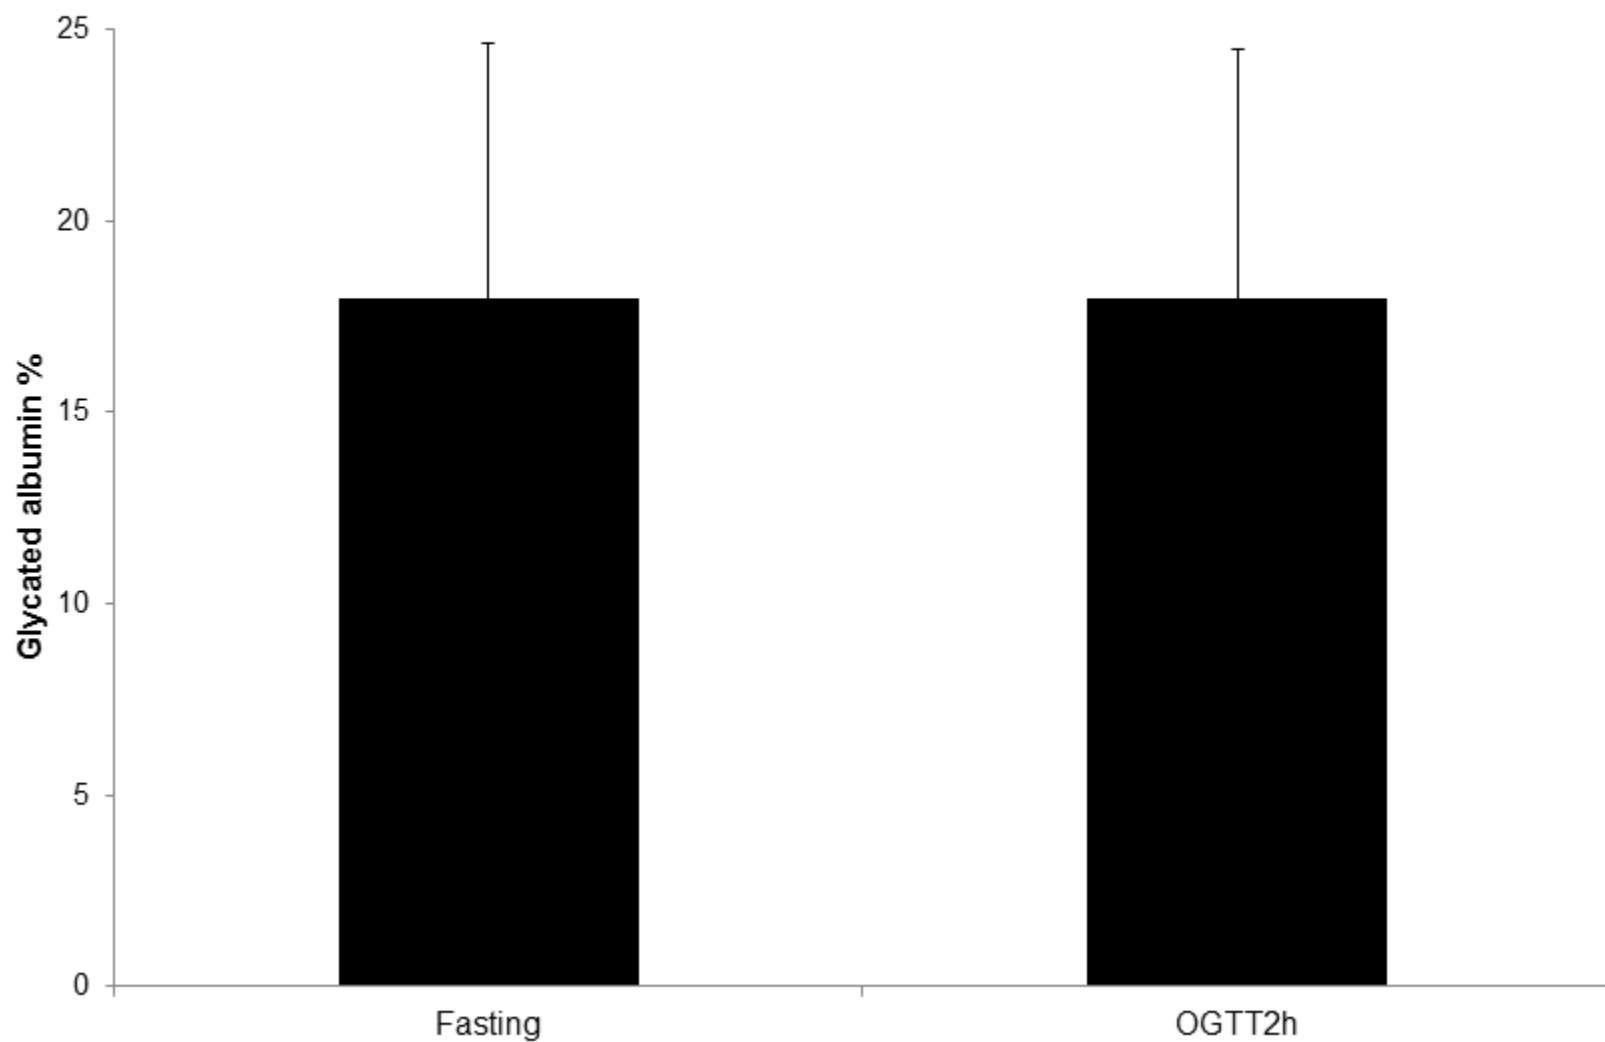

## Supplementary Figure 2C.

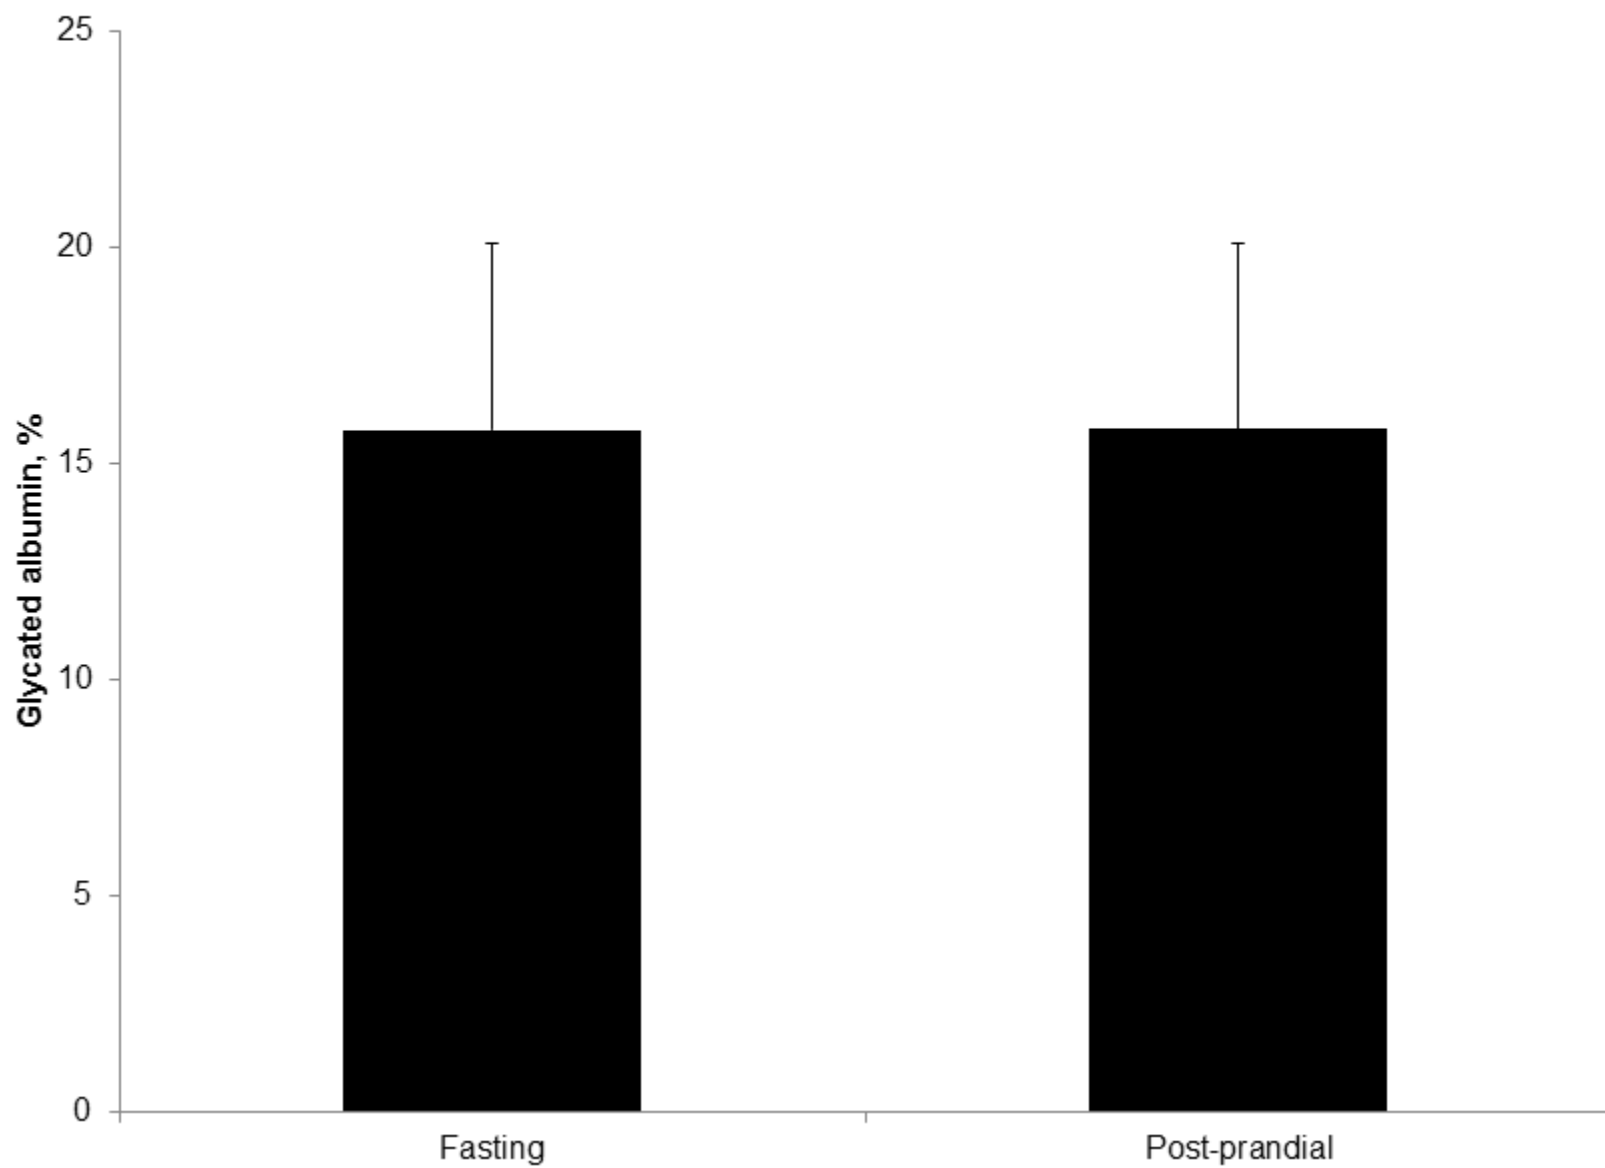

Supplement: pone.0146780.s002.pdf [file pone.0146780.s002.pdf]
