# Supplementary material for: Serum Glycated Albumin to Guide the Diagnosis of Diabetes Mellitus
Source: PubMed Central journal article supplement (PMC4713060; doi:10.1371/journal.pone.0146780), 2016-01-14

**Supplementary Figure 3A.**

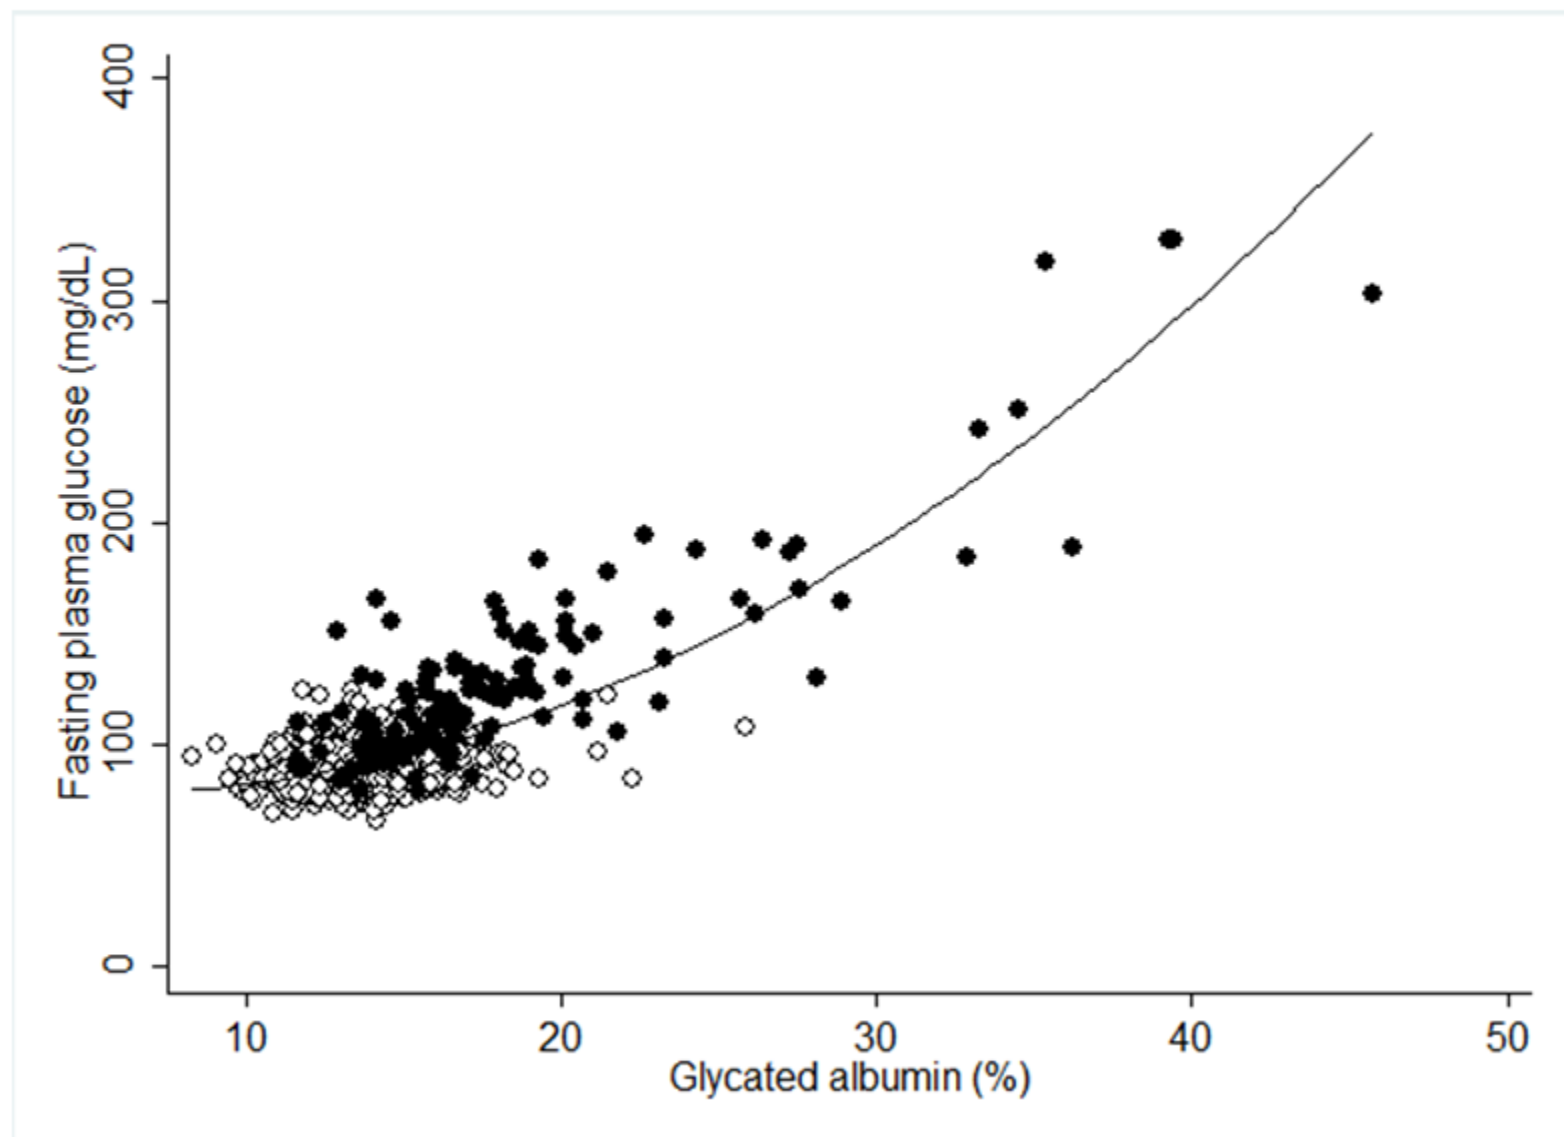

**Supplementary Figure 3B.**

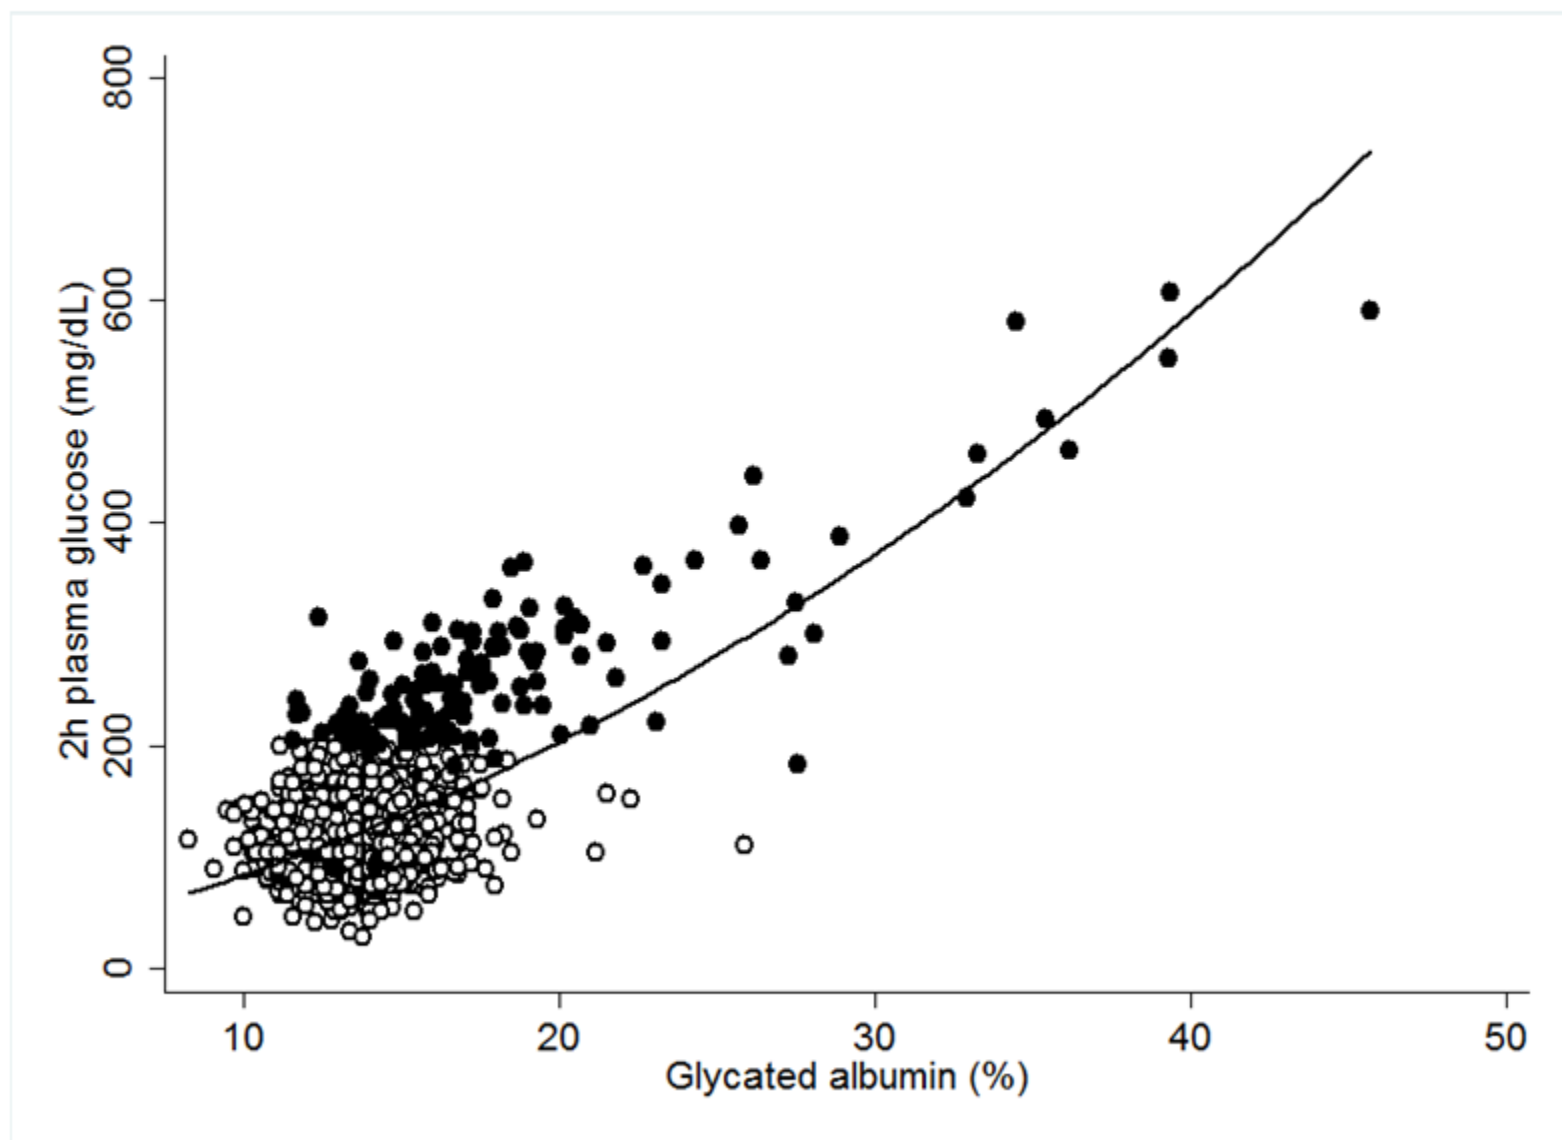

**Supplementary Figure 3C.**

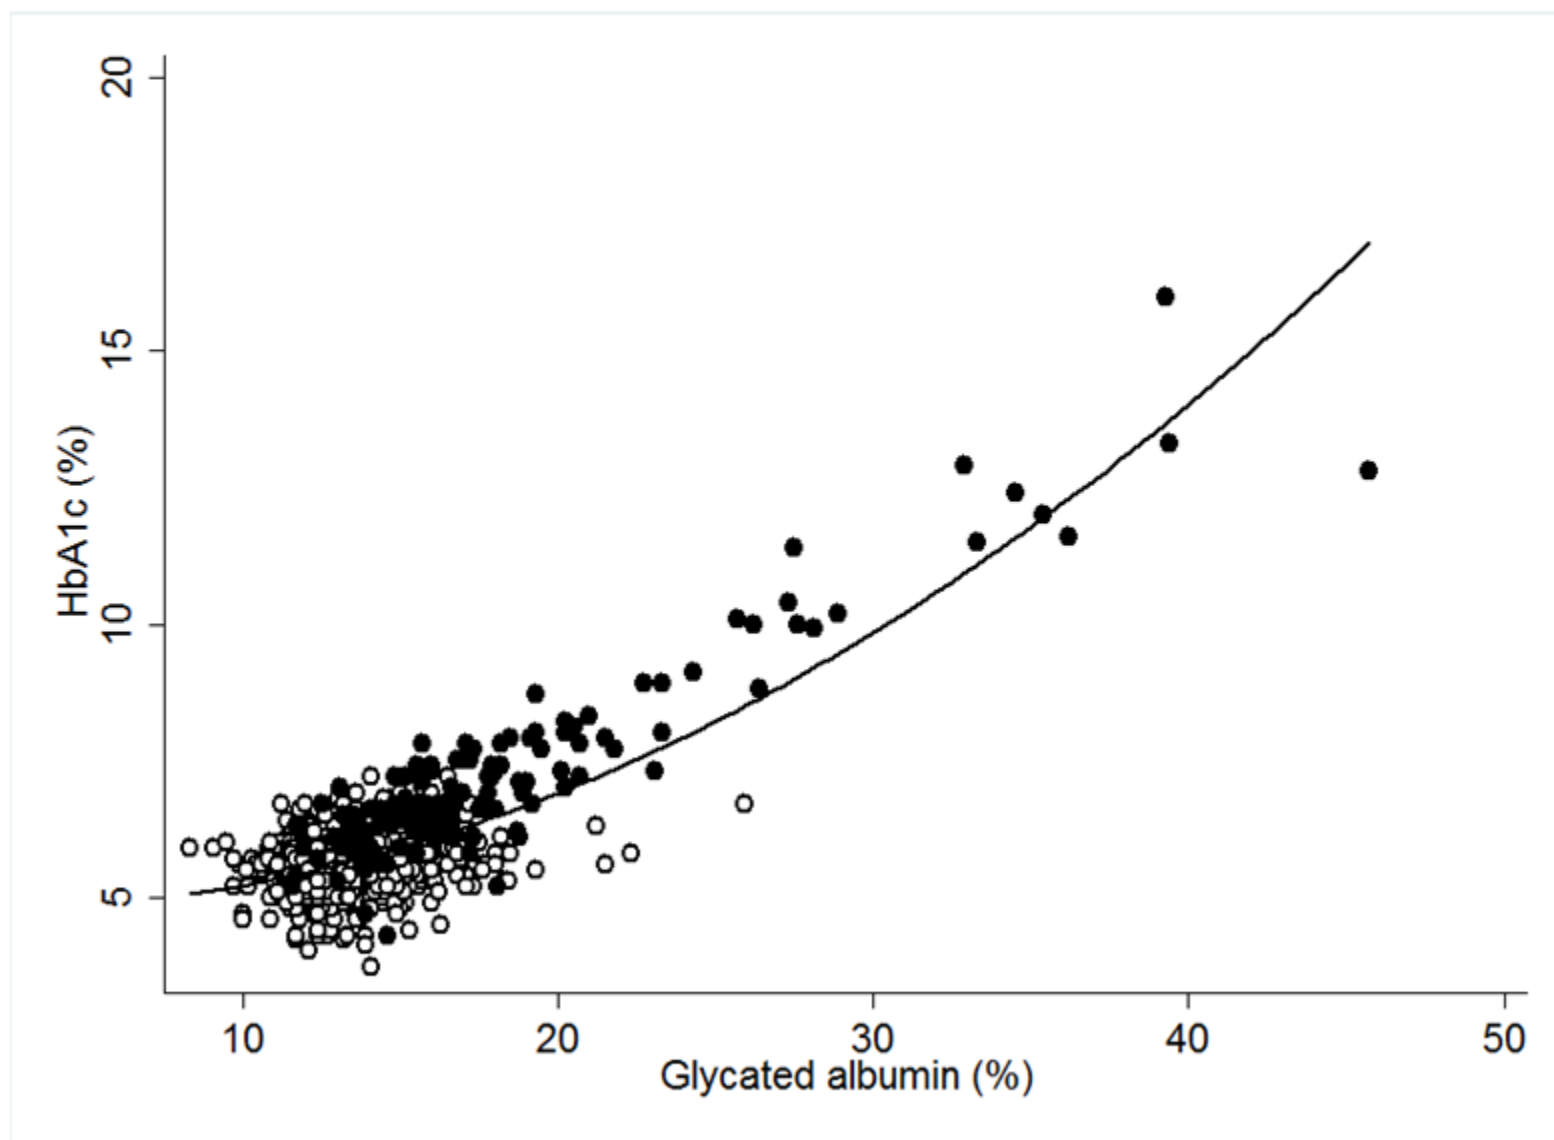

Supplement: pone.0146780.s003.pdf [file pone.0146780.s003.pdf]
